# Supplementary material for: Tunable valley polarization and magnetic anisotropy by polarization reversal in a Ni2Cl3I3/AgBiP2S6 heterojunction
Source: Royal Society of Chemistry journal article supplement (doi:10.1039/d4tc04710a), 2024-11-22
Supplement: d4tc04710a1.pdf [file d4tc04710a1.pdf]

## Supplementary Information

### **Tunable valley polarization and magnetic anisotropy by polarization reversal in $\text{Ni}_2\text{Cl}_3\text{I}_3/\text{AgBiP}_2\text{S}_6$ heterojunction**

Xu Zhang, Bo Chen, Baozeng Zhou\*, and Xiaocha Wang\*

*Tianjin Key Laboratory of Film Electronic & Communicate devices, School of Integrated Circuit Science and Engineering, Tianjin University of Technology, Tianjin 300384, China*

\*Corresponding Authors

[baozeng@tju.edu.cn](mailto:baozeng@tju.edu.cn) (Baozeng Zhou)

[wangxc@email.tjut.edu.cn](mailto:wangxc@email.tjut.edu.cn) (Xiaocha Wang)

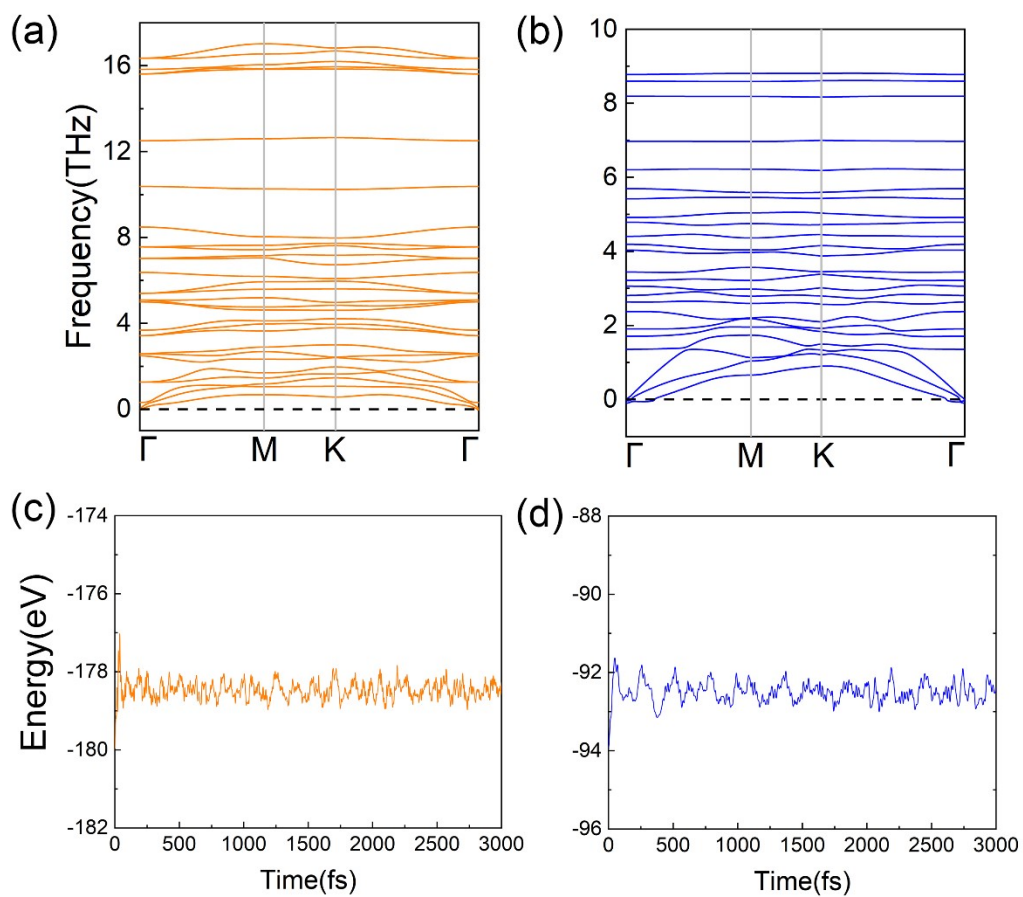

**Fig. S1** Phonon spectrum of (a) AgBiP<sub>2</sub>S<sub>6</sub> and (b) Ni<sub>2</sub>Cl<sub>3</sub>I<sub>3</sub>. Variations of the total potential energy of (c) AgBiP<sub>2</sub>S<sub>6</sub> and (d) Ni<sub>2</sub>Cl<sub>3</sub>I<sub>3</sub> in AIMD simulations at 300 K.

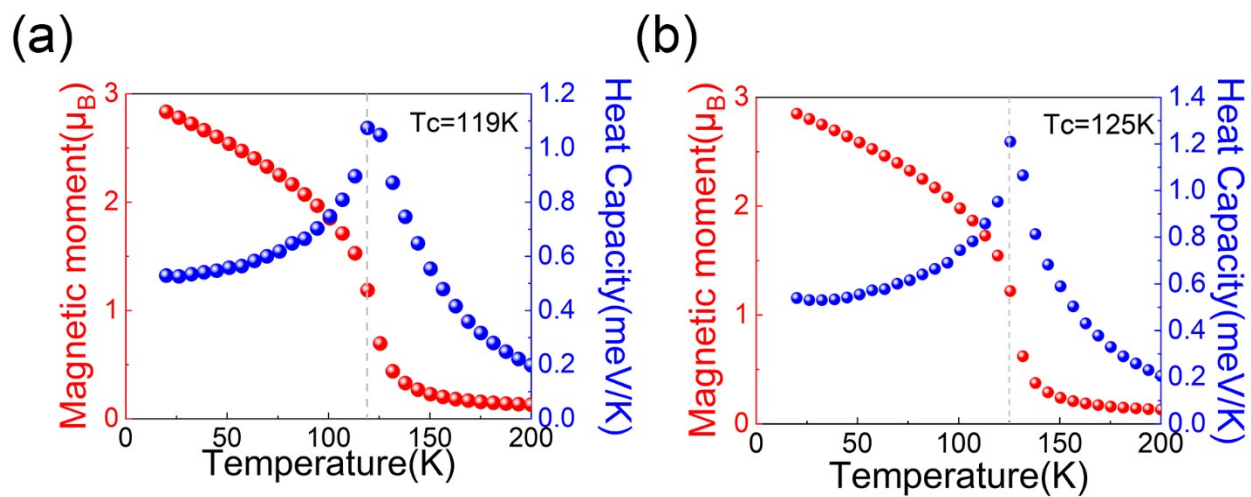

**Fig. S2** The magnetic moment and heat capacity as functions of temperature for (a)  $\text{Ni}_2\text{Cl}_3\text{I}_3$  and (b)

$\text{Ni}_2\text{Cl}_3\text{I}_3/\text{AgBiP}_2\text{S}_6$ .

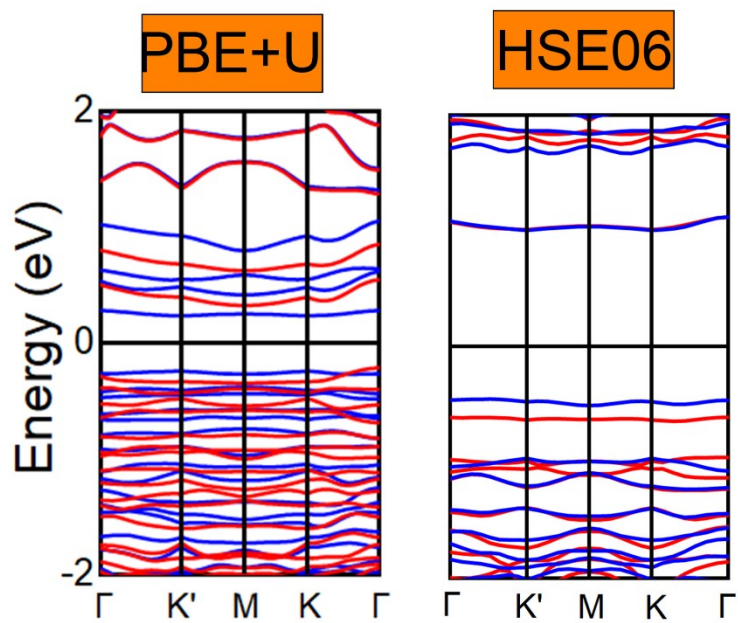

**Fig. S3** The band structures of  $\text{Ni}_2\text{Cl}_3\text{I}_3/\text{AgBiP}_2\text{S}_6$  calculated by the (a) PBE+ $U$  and (b) HSE06.

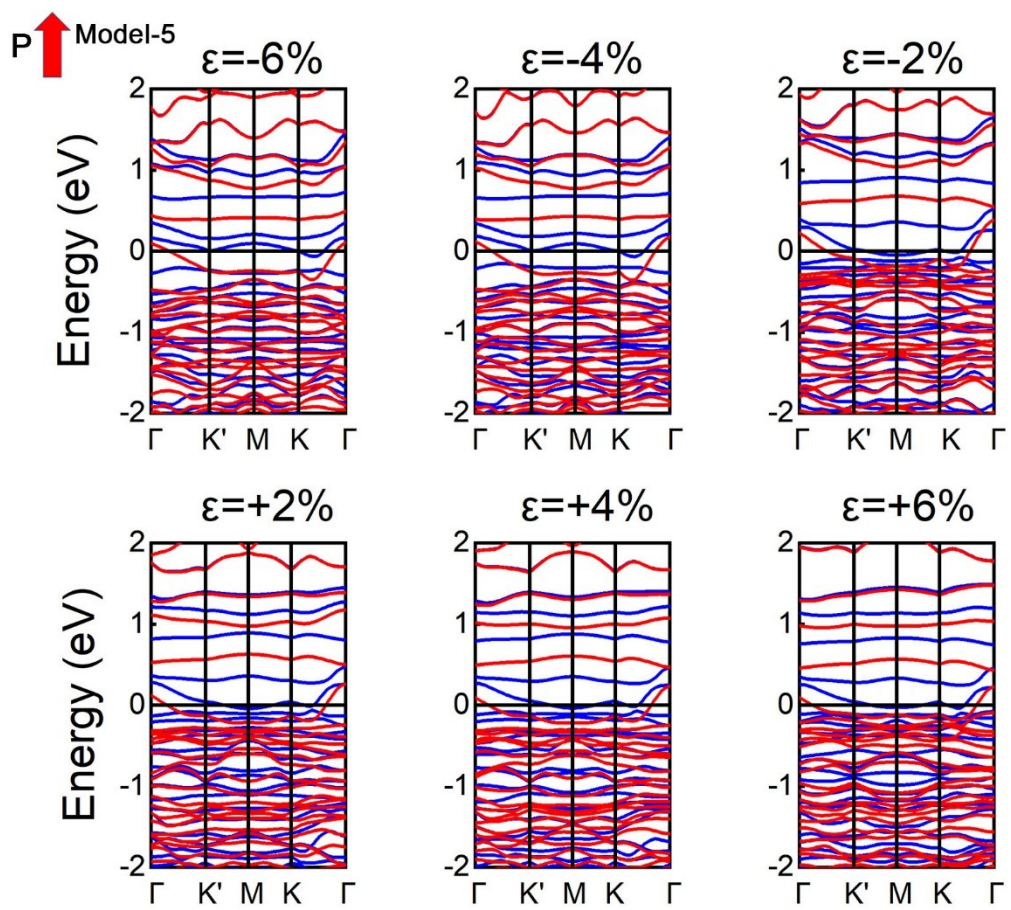

**Fig. S4** The band structures of  $\text{Ni}_2\text{Cl}_3\text{I}_3/\text{AgBiP}_2\text{S}_6$  using the  $\text{PBE}+U$  after applying biaxial strain.

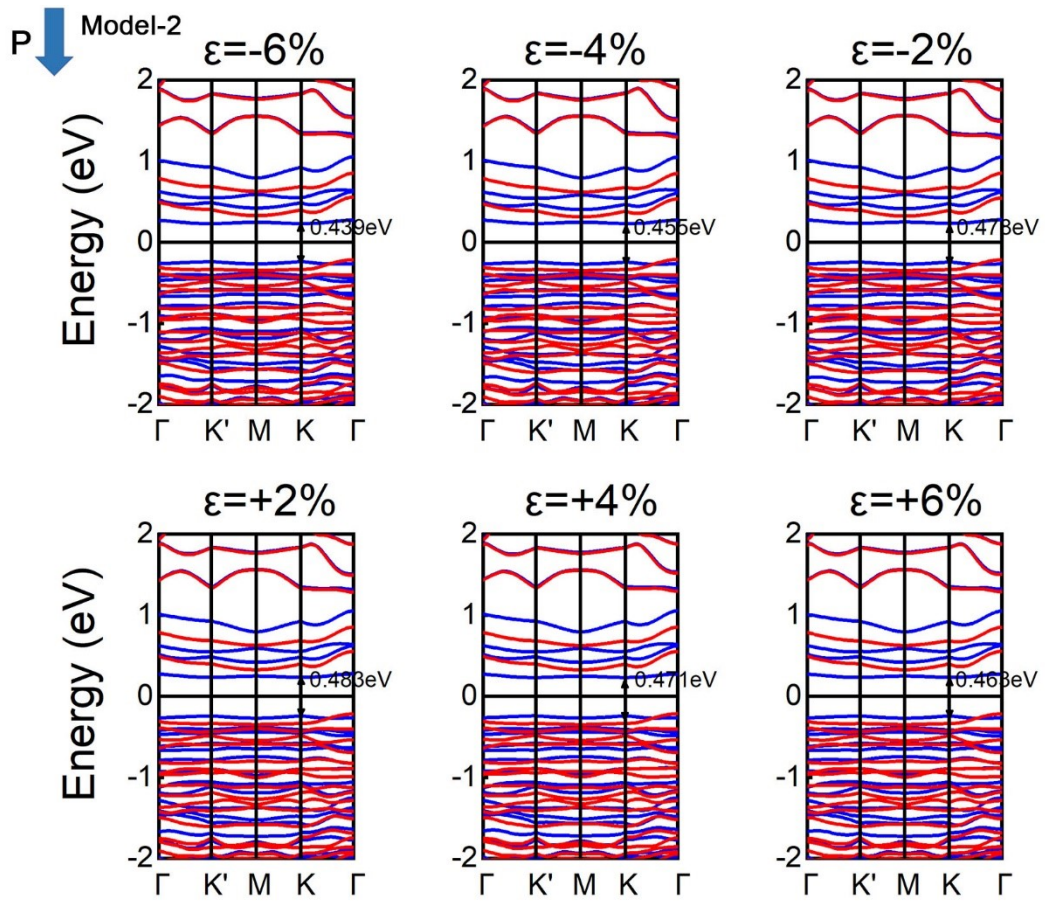

**Fig. S5** The band structures of  $\text{Ni}_2\text{Cl}_3\text{I}_3/\text{AgBiP}_2\text{S}_6$  using the PBE+ $U$  after applying biaxial strain.



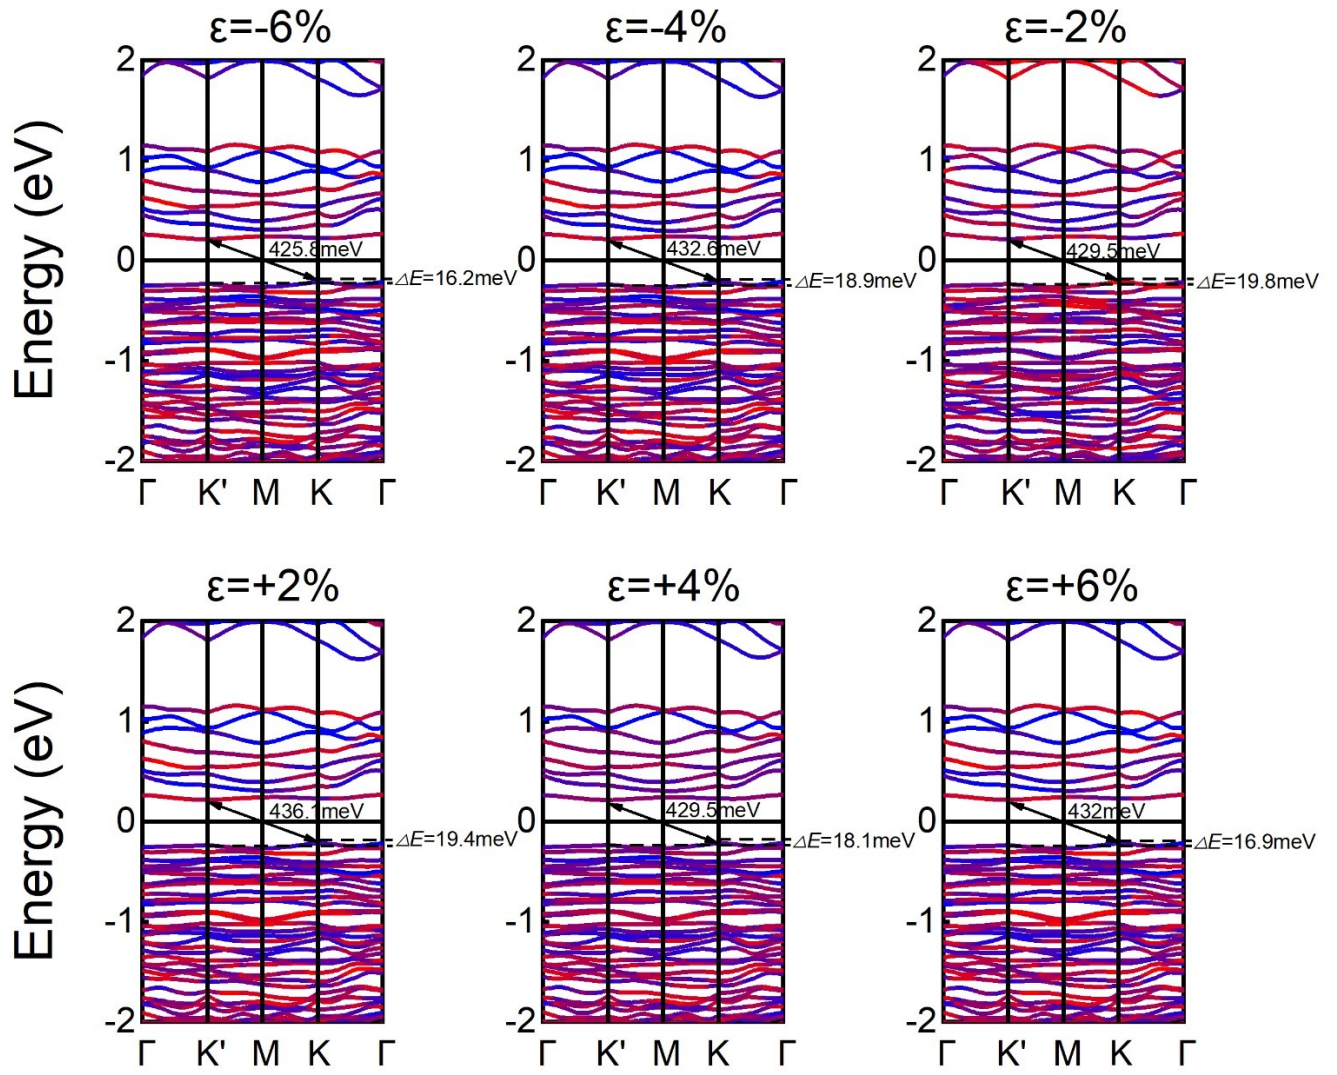

**Fig. S6** The band structures of  $\text{Ni}_2\text{Cl}_3\text{I}_3/\text{AgBiP}_2\text{S}_6$  after applying biaxial strain and SOC.

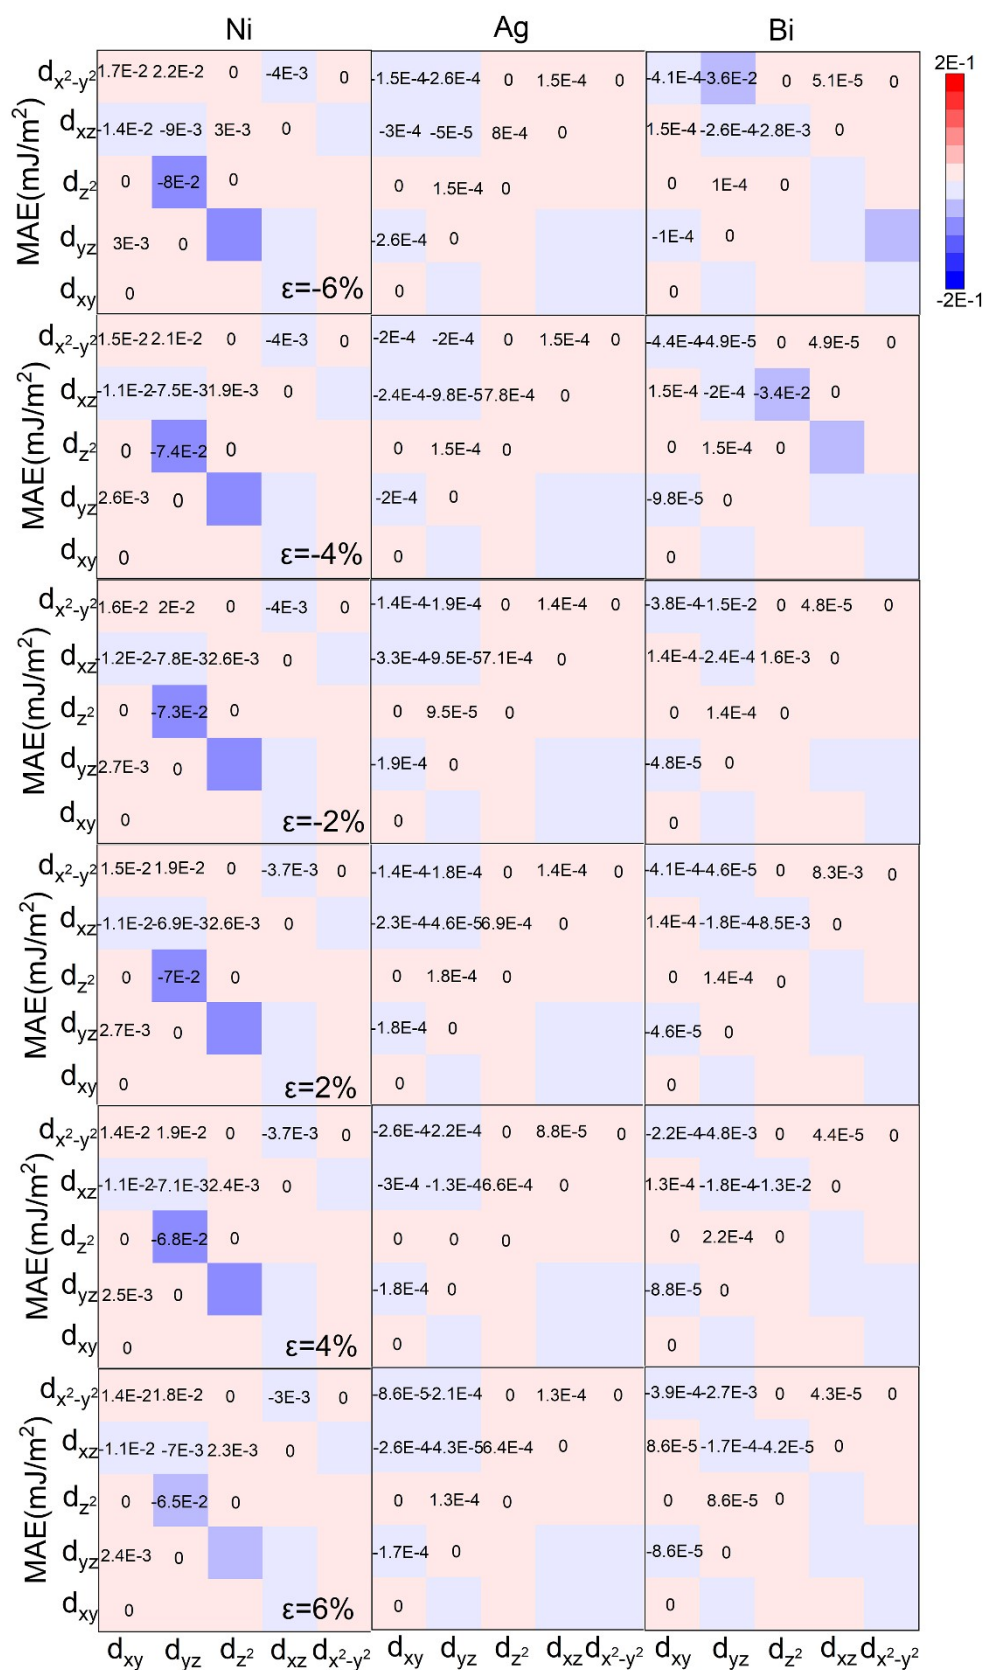

Fig. S7 The MAE of Ni, Ag and Bi atoms in model-2↓ after applying biaxial strain.
